# Supplementary material
Source: publisher site journal article supplement (https://www.dovepress.com/article/supplementary_file/601372/601372%20Appendix_1.docx)
Supplement: Supplementary file 1 [file 601372%20Appendix_1.docx]

## Appendix

**Note**: This appendix shows how respondents ranked the factors in Question 12, both across professions and within each profession. Bolded values indicate p-values that indicated a statistically significant difference after correction for multiple comparisons, and the row and column labels show the comparisons being made.

| Question 12 - "Please rank the following factors in how much they influence your decision to adopt and use an evaluation method. (drag and drop)" | | | | | | | | | | |
| --- | --- | --- | --- | --- | --- | --- | --- | --- | --- | --- |
| Between Profession Comparison - Kruskal Wallis | | | | | Between Profession Comparison - Pairwise Dunn’s Test (with BH correction) | | | | | |
| **name** | **attribute** | **h-stat** | **p.val** | **p.adj** | **p.res_CPO** | **p.res_MD** | **p.res_PT** | **p.CPO_PT** | **p.MD_CPO** | **p.MD_PT** |
| Q12_4 | Efficacy of Monitoring Patient Progress | 16.2675 | 0.0027 | 0.0241 | **0.0137** | 0.1894 | 0.6539 | **0.0198** | 0.1557 | 0.1375 |
| Q12_2 | Comprehensive analysis of multi-grasp dexterity and impact of varying control systems | 13.9873 | 0.0073 | 0.0330 | **0.0166** | **0.0231** | **0.0506** | 0.7911 | 0.7911 | 0.8721 |
| Q12_1 | Total Administration Time | 8.4454 | 0.0766 | 0.1723 | 0.1606 | 0.2381 | 0.3546 | 0.8180 | 0.8180 | 0.9638 |
| Q12_6 | Does not Require a Training to Accurately Use the Test | 8.6858 | 0.0695 | 0.1723 | 0.2749 | 0.9771 | 0.2848 | 0.2153 | 0.2749 | 0.2848 |
| Q12_9 | Test has Been Validated and Peer-Reviewed | 7.2573 | 0.1229 | 0.2212 | 0.6393 | 0.4084 | 0.4084 | 0.4993 | 0.4084 | 0.9528 |
| Q12_3 | Acqusition Cost | 6.5074 | 0.1643 | 0.2257 | 0.4316 | 0.3061 | 0.9742 | 0.5882 | 0.5882 | 0.4316 |
| Q12_8 | Integrated Mechanism for Patient Feedback | 6.3339 | 0.1756 | 0.2257 | 0.4003 | 0.8032 | 0.1899 | 0.7372 | 0.4138 | 0.1899 |
| Q12_5 | Space Required to Store Materials | 1.7078 | 0.7893 | 0.8709 | 0.9886 | 0.9886 | 0.9886 | 0.9886 | 0.9886 | 0.9886 |
| Q12_7 | Accessibility of Acquiring Materials | 1.2434 | 0.8709 | 0.8709 | 1.0000 | 1.0000 | 1.0000 | 1.0000 | 1.0000 | 1.0000 |
| Within Profession Comparison - Friedman | | | | | | | | | | |
|  | **Profession** | **statistic** | **p.val** |  | | | | | | |
| Physical and Occupational Therapists | 50.2974 | 3E-08 |
| Certified Prosthetists and Orthotists | 65.6666 | 3E-11 |
| Medical Doctors | 101.195 | 2E-18 |
| Researchers | 97.5188 | 1E-17 |
| Within Profession Comparison - Pairwise Conover (holm correction) | | | | | | | | | | |
|  | **Researchers** | **Q12_1** | **Q12_2** | **Q12_3** | **Q12_4** | **Q12_5** | **Q12_6** | **Q12_7** | **Q12_8** |  |
| **Q12_2** | 1.0E+0 | *NA* | *NA* | *NA* | *NA* | *NA* | *NA* | *NA* |
| **Q12_3** | 8.7E-05 | 5E-07 | *NA* | *NA* | *NA* | *NA* | *NA* | *NA* |
| **Q12_4** | 1.0E+0 | 1E+0 | 2E-08 | *NA* | *NA* | *NA* | *NA* | *NA* |
| **Q12_5** | 2.6E-08 | 5E-11 | 1E+0 | 1.50E-12 | *NA* | *NA* | *NA* | *NA* |
| **Q12_6** | 8.7E-05 | 5E-07 | 1E+0 | 2.62E-08 | 1.00E+00 | *NA* | *NA* | *NA* |
| **Q12_7** | 3.3E-05 | 1E-07 | 1E+0 | 7.94E-09 | 1.00E+00 | 1.00E+00 | *NA* | *NA* |
| **Q12_8** | 8.9E-03 | 1E-04 | 1E+0 | 8.78E-06 | 6.11E-02 | 1.00E+00 | 1.00E+00 | *NA* |
| **Q12_9** | 1.3E-01 | 1E+0 | 1E-10 | 1.00E+00 | 5.65E-15 | 1.86E-10 | 5.32E-11 | 1.16E-07 |
| **Physical and Occupational Therapists** | **Q12_1** | **Q12_2** | **Q12_3** | **Q12_4** | **Q12_5** | **Q12_6** | **Q12_7** | **Q12_8** |
| **Q12_2** | 4.2E-01 | *NA* | *NA* | *NA* | *NA* | *NA* | *NA* | *NA* |
| **Q12_3** | 2.1E-03 | 1E+0 | *NA* | *NA* | *NA* | *NA* | *NA* | *NA* |
| **Q12_4** | 1.0E+0 | 5.1E-1 | 2.7E-3 | *NA* | *NA* | *NA* | *NA* | *NA* |
| **Q12_5** | 2.5E-06 | 1.4E-2 | 1.E+0 | 3.78E-06 | *NA* | *NA* | *NA* | *NA* |
| **Q12_6** | 3.7E-06 | 1.8E-2 | 1.E+0 | 5.43E-06 | 1.00E+00 | *NA* | *NA* | *NA* |
| **Q12_7** | 8.0E-04 | 6.0E-1 | 1.E+0 | 1.07E-03 | 1.00E+00 | 1.00E+00 | *NA* | *NA* |
| **Q12_8** | 1.2E-05 | 4.4E-2 | 1.E+0 | 1.76E-05 | 1.00E+00 | 1.00E+00 | 1.00E+00 | *NA* |
| **Q12_9** | 1.0E+0 | 1.E+0 | 1.2E-1 | 1.00E+00 | 5.72E-04 | 8.00E-04 | 5.67E-02 | 2.11E-03 |
| **Medical Doctors** | **Q12_1** | **Q12_2** | **Q12_3** | **Q12_4** | **Q12_5** | **Q12_6** | **Q12_7** | **Q12_8** |
| **Q12_2** | 3.4E-03 | *NA* | *NA* | *NA* | *NA* | *NA* | *NA* | *NA* |
| **Q12_3** | 6.7E-05 | 1.E+0 | *NA* | *NA* | *NA* | *NA* | *NA* | *NA* |
| **Q12_4** | 5.9E-01 | 6.2E-1 | 6.6E-2 | *NA* | *NA* | *NA* | *NA* | *NA* |
| **Q12_5** | 8.6E-14 | 8.7E-5 | 4.2E-3 | 8.33E-09 | *NA* | *NA* | *NA* | *NA* |
| **Q12_6** | 9.1E-10 | 2.6E-2 | 3.4E-1 | 2.06E-05 | 8.78E-01 | *NA* | *NA* | *NA* |
| **Q12_7** | 5.9E-09 | 6.6E-2 | 6.2E-1 | 8.76E-05 | 6.25E-01 | 1.00E+00 | *NA* | *NA* |
| **Q12_8** | 3.6E-12 | 9.8E-4 | 3.0E-2 | 2.11E-07 | 1.00E+00 | 1.00E+00 | 1.00E+00 | *NA* |
| **Q12_9** | 1.0E+0 | 5.9E-4 | 8.2E-6 | 2.20E-01 | 4.28E-15 | 6.15E-11 | 4.32E-10 | 1.98E-13 |
| **Certified Prosthetists and Orthotists** | **Q12_1** | **Q12_2** | **Q12_3** | **Q12_4** | **Q12_5** | **Q12_6** | **Q12_7** | **Q12_8** |
| **Q12_2** | 0.00041 | *NA* | *NA* | *NA* | *NA* | *NA* | *NA* | *NA* |
| **Q12_3** | 0.00002 | 1.0000 | *NA* | *NA* | *NA* | *NA* | *NA* | *NA* |
| **Q12_4** | 0.01254 | 1.0000 | 1.0000 | *NA* | *NA* | *NA* | *NA* | *NA* |
| **Q12_5** | 0.00000 | 0.0106 | 0.1056 | 0.00033 | *NA* | *NA* | *NA* | *NA* |
| **Q12_6** | 0.00016 | 1.0000 | 1.0000 | 1.00000 | 0.02192 | *NA* | *NA* | *NA* |
| **Q12_7** | 0.00000 | 1.0000 | 1.0000 | 0.16718 | 1.00000 | 1.00000 | *NA* | *NA* |
| **Q12_8** | 0.00000 | 1.0000 | 1.0000 | 0.18746 | 0.98163 | 1.00000 | 1.00000 | *NA* |
| **Q12_9** | 0.42485 | 0.5342 | 0.0927 | 1.00000 | 0.00000 | 0.33318 | 0.00317 | 0.00381 |
